# Supplementary material
Source: PubMed Central journal article supplement (PMC9489674)
Supplement: NIHMS1825282-supplement-Supplemental_Digital_Content_3.pdf [file NIHMS1825282-supplement-Supplemental_Digital_Content_3.pdf]

### Supplemental Digital Content 3

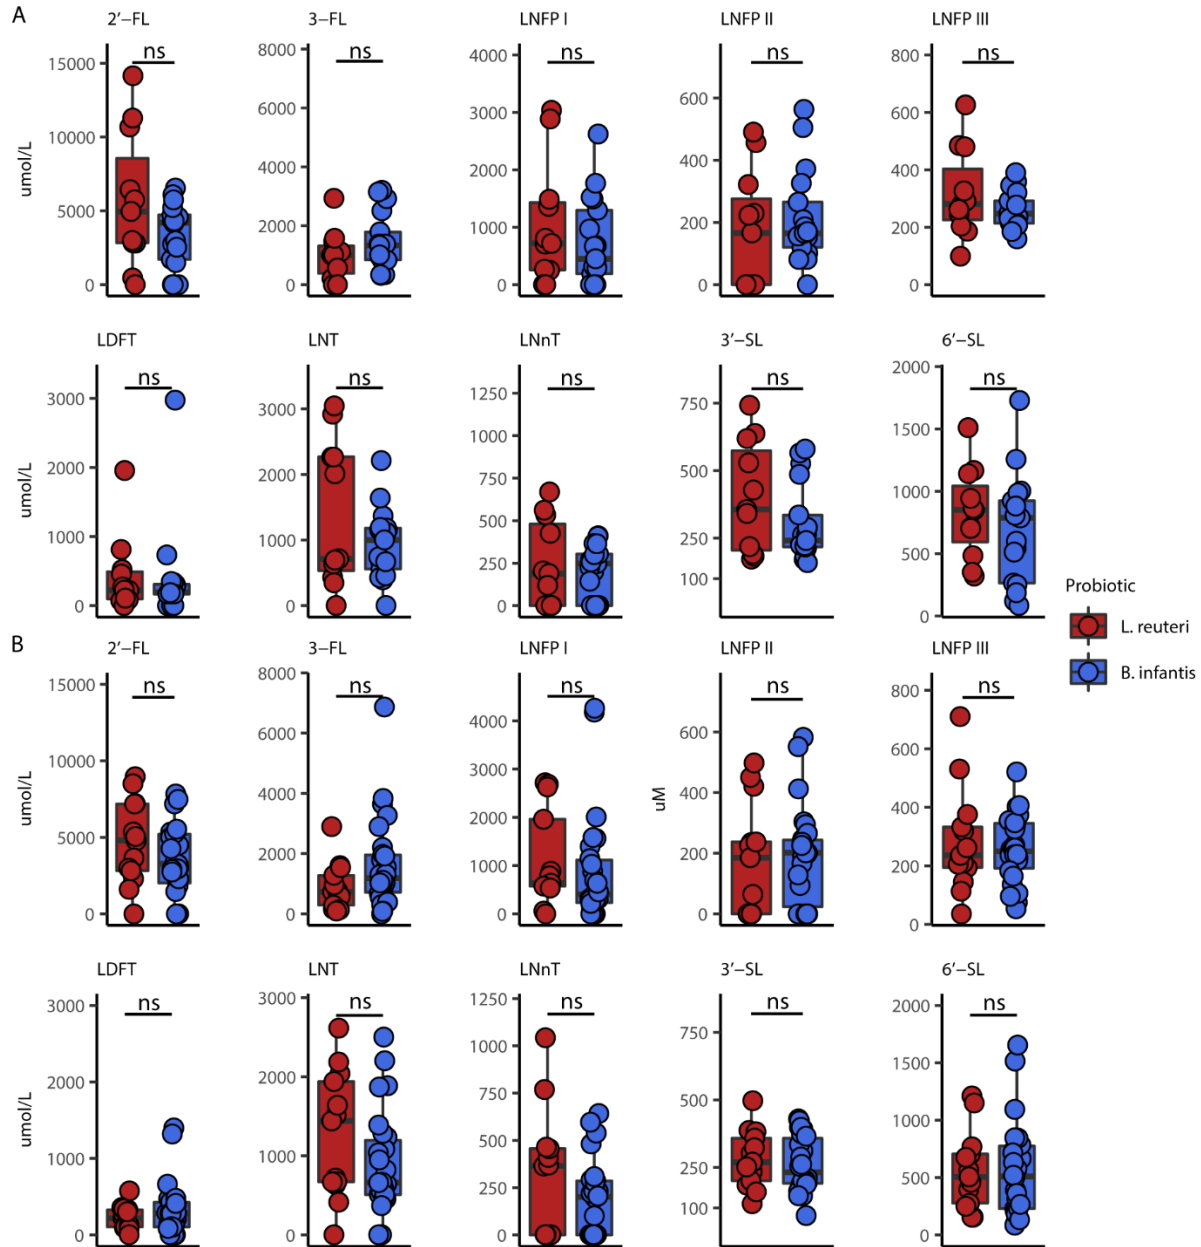

Figure. Concentrations of HMOs from milk samples consumed by infants in *L. reuteri* and *B. infantis* groups collected at 30 and 32 weeks CGA. (A) HMO concentrations from milk provided at 30 weeks CGA. (B) HMO concentrations from milk provided at 32 weeks CGA. Boxplots represent medians and interquartile range (IQR). Between group differences were evaluated by Wilcoxon rank-sum test with FDR correction for multiple comparisons. ns; non-significant. Abbreviations: 2'-FL, 2'-fucosyllactose; 3-FL, 3-fucosyllactose; LNFP I, Lacto-N-fucopentaose I; LNFP II, Lacto-N-fucopentaose II; LNFP III, Lacto-N-fucopentaose III; LDFT, Lactodifucotetraose; LNT, Lacto-N-tetraose; LNnT, Lacto-N-neotetraose; 3'-SL, 3'-sialyllactose; 6'-SL, 6'-sialyllactose.
