# Supplementary material
Source: PubMed Central journal article supplement (PMC9489674)
Supplement: NIHMS1825282-supplement-Supplemental_Digital_Content_4.pdf [file NIHMS1825282-supplement-Supplemental_Digital_Content_4.pdf]

## Supplemental Digital Content 4

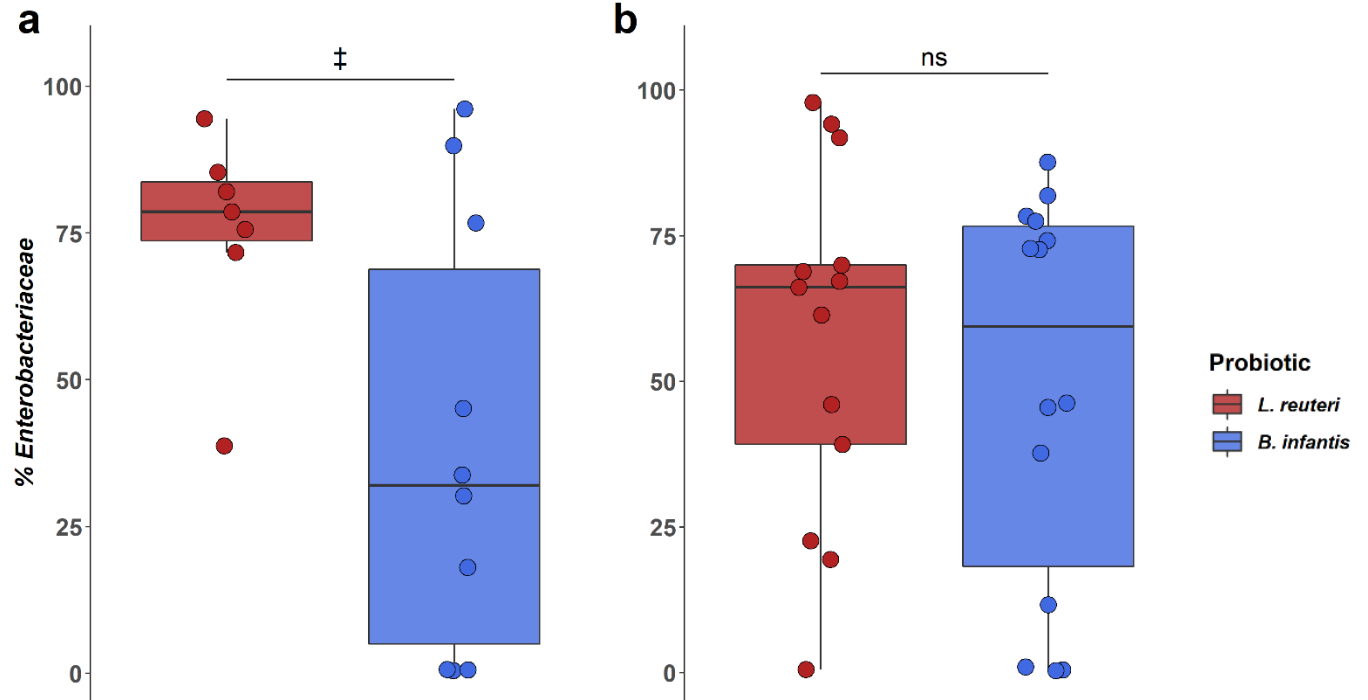

Figure. Relative abundance of *Enterobacteriaceae* in preterm infant fecal microbiota at (a) 30 and (b) 32 weeks CGA in infants receiving *L. reuteri* or *B. infantis*. Boxplots represent medians and interquartile range (IQR) with whisker end points equal to the maximum and minimum values below or above the median at 1.5 times the IQR. ‡  $p < 0.10$ , ns; non-significant. Wilcoxon rank-sum test with FDR correction for multiple comparisons.
