# Supplementary material
Source: PubMed Central journal article supplement (PMC9489674)
Supplement: NIHMS1825282-supplement-Supplemental_Digital_Content_5.pdf [file NIHMS1825282-supplement-Supplemental_Digital_Content_5.pdf]

Supplemental Digital Content 5

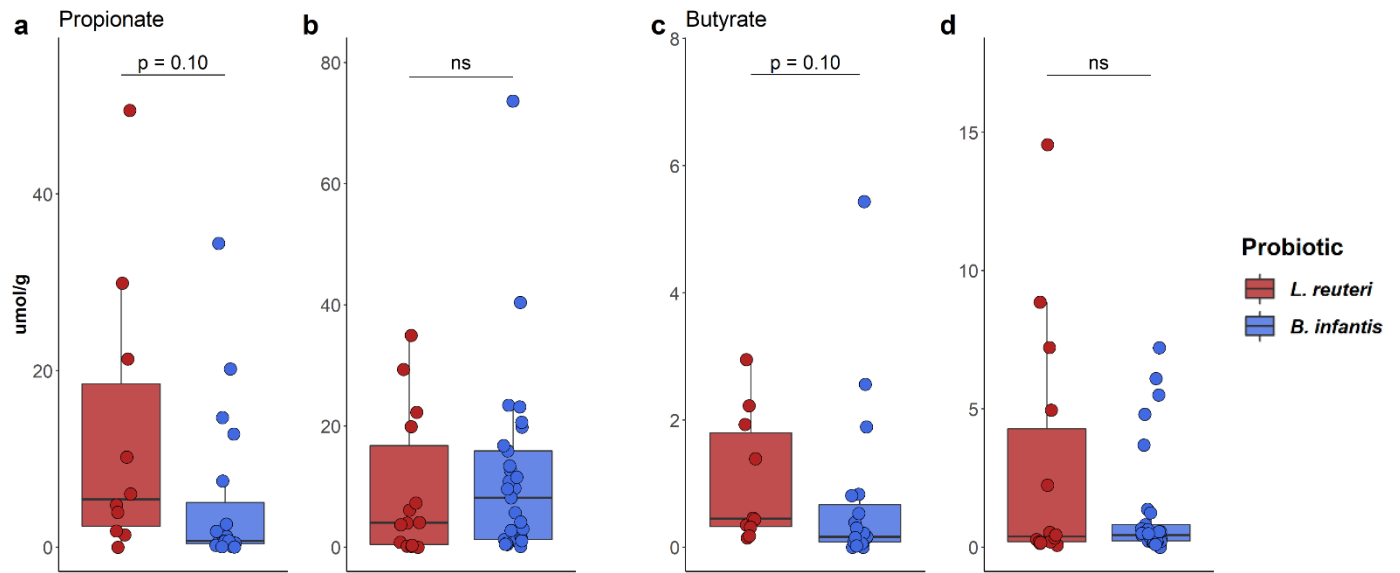

Figure. Fecal propionate in preterm infants at (a) 30 weeks and (b) 32 weeks and butyrate at (c) 30 weeks and (d) 32 weeks CGA. Boxplots represent medians and interquartile range (IQR) with whisker end points equal to the maximum and minimum values below or above the median at 1.5 times the IQR. ns; non-significant; Wilcoxon rank-sum test with FDR correction for multiple comparisons.
