# Supplementary material
Source: PubMed Central journal article supplement (PMC9489674)
Supplement: NIHMS1825282-supplement-Supplemental_Digital_Content_6.pdf [file NIHMS1825282-supplement-Supplemental_Digital_Content_6.pdf]

## Supplemental Digital Content 6

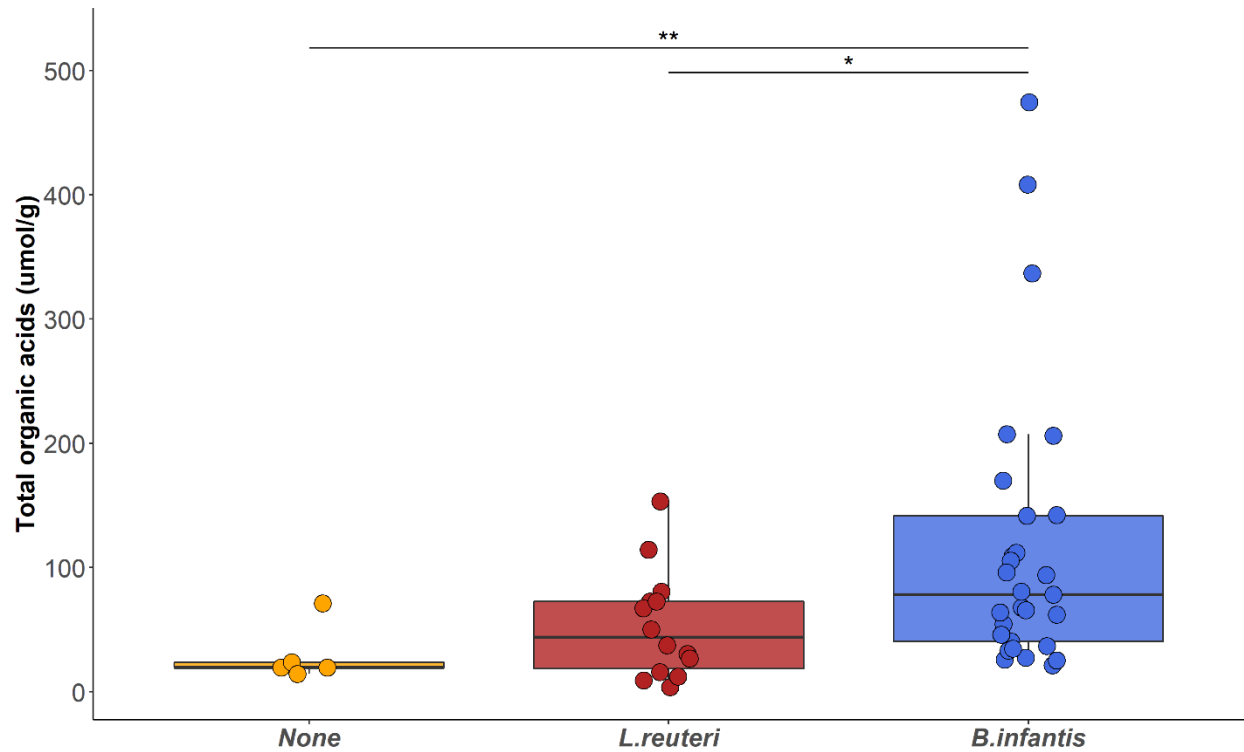

Figure. Total organic acids in fecal samples at 32 weeks CGA. Total organic acids are the sum of formate, acetate, propionate, butyrate, lactate and pyruvate. Boxplots represent medians and interquartile range (IQR) with whisker end points equal to the maximum and minimum values below or above the median at 1.5 times the IQR. \*  $p < 0.05$ , \*\*  $p < 0.01$ ; Kruskal-Wallis H-test with Dunn's post hoc test corrected for multiple comparisons by setting FDR to 0.05.
