# Supplementary material
Source: PubMed Central journal article supplement (PMC9489674)
Supplement: NIHMS1825282-supplement-Supplemental_Digital_Content_7.pdf [file NIHMS1825282-supplement-Supplemental_Digital_Content_7.pdf]

## Supplemental Digital Content 7

Table. Characteristics of infants who did not receive probiotics

|                                           | <i>No probiotic</i> (N=5) |
|-------------------------------------------|---------------------------|
| Birth weight (g), mean (SD)               | 1958 (145)                |
| Gestational age (weeks), mean (SD)        | 31.6 (0.5)                |
| Male N (%)                                | 5 (100)                   |
| Cesarean N (%)                            | 4 (80)                    |
| One minute Apgar, median (IQR)            | 5 (1,7)                   |
| Five minute Apgar, median (IQR)           | 8 (5,8)                   |
| DOL first feeding, median (IQR)           | 1 (1,3)                   |
| DOL full enteral feeding, median (IQR)    | 9 (7,9)                   |
| Total days NPO, median (IQR)              | 1 (0,3)                   |
| First feeding MOM, N (%)                  | 5 (100)                   |
| Antibiotic days, mean (SD)                | 2 (0)                     |
| NEC stage 2 or 3, N (%)                   | 0 (0)                     |
| SIP, N (%)                                | 0 (0)                     |
| BPD, N (%)                                | 1 (20)                    |
| Culture positive sepsis, N (%)            | 0 (0)                     |
| Death, N (%)                              | 0 (0)                     |
| Length of hospital stay (days), mean (SD) | 38 (18)                   |

N=number, SD=standard deviation, IQR=interquartile range, DOL=day of life, MOM=mother's own milk, NEC=necrotizing enterocolitis, SIP=spontaneous intestinal perforation, BPD=bronchopulmonary dysplasia
