# Supplementary material
Source: PubMed Central journal article supplement (PMC9489674)
Supplement: NIHMS1825282-supplement-Supplemental_Digital_Content_9.pdf [file NIHMS1825282-supplement-Supplemental_Digital_Content_9.pdf]

### Supplemental Digital Content 9

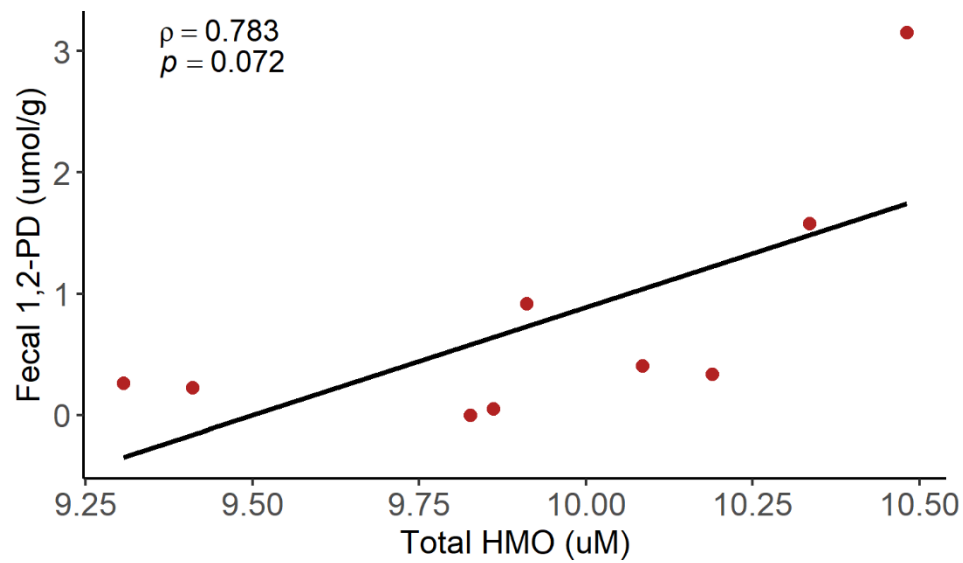

Figure. Spearman's correlation between 1,2-propanediol (1,2-PD) with total HMO content in milk for infants receiving the *L. reuteri* probiotic at week 30 CGA. Data shown are generalized log transformed ( $\log(y + \sqrt{y^2 + 1})$ ). Total HMO is the sum of 2'-fucosyllactose, 3-fucosyllactose, Lacto-N-fucopentaose I, Lacto-N-fucopentaose II, Lacto-N-fucopentaose III, Lactodifucotetraose, Lacto-N-tetraose, Lacto-N-neotetraose, 3'-sialyllactose and 6'-sialyllactose.
