# Supplementary material
Source: PubMed Central journal article supplement (PMC9489674)

## Supplemental Digital Content 1

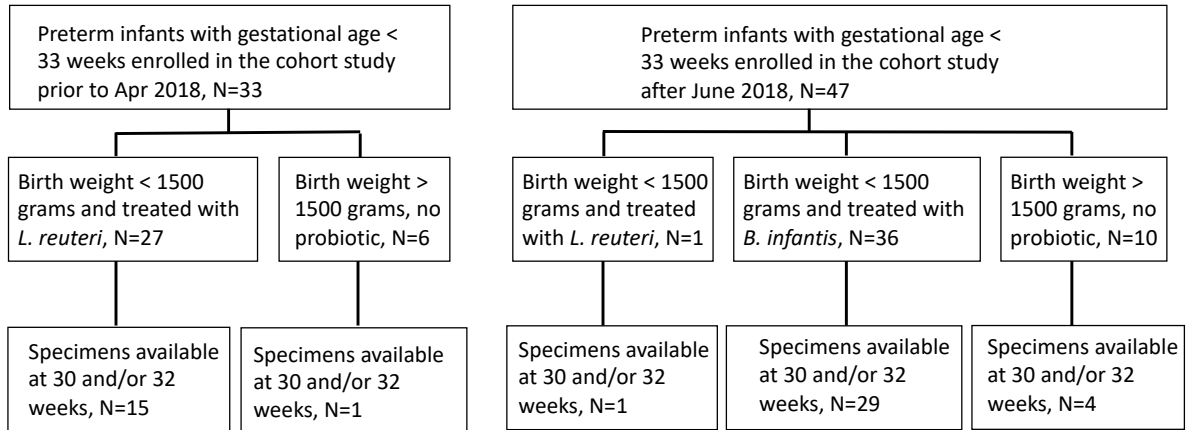

Figure. Flow diagram showing the design of the cohort study.

Supplement: NIHMS1825282-supplement-Supplemental_Digital_Content_1.pdf [file NIHMS1825282-supplement-Supplemental_Digital_Content_1.pdf]
